# Supplementary material for: Infrared nonlinear optical sulfide CsCd4In5S12 exhibiting large second harmonic generation response
Source: Royal Society of Chemistry journal article supplement (doi:10.1039/d1tc05800b), 2022-01-01
Supplement: d1tc05800b1.pdf [file d1tc05800b1.pdf]

## ***Supporting Information for***

# **Infrared Nonlinear Optical Sulfide CsCd<sub>4</sub>In<sub>5</sub>S<sub>12</sub> exhibiting Large Second Harmonic Generation Response**

Yang Wang,<sup>a,b,e</sup> Ruiqi Wang,<sup>g</sup> Xiangli Che,<sup>b,f</sup> Fei Liang,<sup>c</sup> Min Luo,<sup>d</sup> Yufeng Tang,<sup>\*,b</sup>

Yunzhen Cao<sup>\*,a</sup> and Fuqiang Huang<sup>\*,b,f,g</sup>

*<sup>a</sup> Key Laboratory of Inorganic Coating Materials CAS, Shanghai Institute of Ceramics, Chinese Academy of Sciences, Shanghai 201800, China*

*<sup>b</sup> State Key Laboratory of High Performance Ceramics and Superfine Microstructure, Shanghai Institute of Ceramics, Chinese Academy of Sciences, Shanghai 200050, China*

*<sup>c</sup> State Key Laboratory of Crystal Materials and Institute of Crystal Materials, Shandong University, Jinan 250100, China*

*<sup>d</sup> Key Laboratory of Optoelectronic Materials Chemistry and Physics, Fujian Institute of Research on the Structure of Matter, Chinese Academy of Sciences, Fuzhou, Fujian 350002, China*

*<sup>e</sup> Center of Materials Science and Optoelectronics Engineering, University of Chinese Academy of Sciences, Beijing 100049, China*

*<sup>f</sup> CAS Center for Excellence in Superconducting Electronic (CENSE), Shanghai 200050, China.*

*<sup>g</sup> State Key Laboratory of Rare Earth Materials Chemistry and Applications, College of Chemistry and Molecular Engineering, Peking University, Beijing 100871, China*

## List of contents:

### 1. Supplementary figures.

**Figure S1.** The SEM image and EDS result of CsCd<sub>4</sub>In<sub>5</sub>S<sub>12</sub> crystal, and element mapping of Cs, Cd, In and S in CsCd<sub>4</sub>In<sub>5</sub>S<sub>12</sub>.

**Figure S2.** IR spectrum of CsCd<sub>4</sub>In<sub>5</sub>S<sub>12</sub> measured with a single crystal (a) and powder sample (b)

**Figure S3.** Raman spectrum of CsCd<sub>4</sub>In<sub>5</sub>S<sub>12</sub>.

**Figure S4.** PXRD of CsCd<sub>4</sub>In<sub>5</sub>S<sub>12</sub> after being heated at 1061 K (a) and 1193 K (b)

**Figure S5.** Structure models of CsCd<sub>4</sub>In<sub>5</sub>S<sub>12</sub> used for calculation. A structure model with the disordered sites (the site M1 marked in Figure R4a) occupied by Cd (a) or by Cd and In in a ratio of 1:2 (b) or all by In atoms (c). Calculated refractive dispersion curve of CsCd<sub>4</sub>In<sub>5</sub>S<sub>12</sub> model a (d), model b (e) and model c (f).

**Figure S6.** A structure model of CsCd<sub>4</sub>In<sub>5</sub>S<sub>12</sub> used for calculation.

**Figure S7.** E<sub>g</sub> vs the relative molecular mass (a) and E<sub>g</sub> vs the volume (b) of compounds in the A-X<sup>II</sup><sub>4</sub>-X<sup>III</sup><sub>5</sub>-Q<sub>12</sub> system

### 2. Supplementary tables.

**Table S1.** EDS results of CsCd<sub>4</sub>In<sub>5</sub>S<sub>12</sub>.

**Table S2.** The unit cell volume, SHG response at the particle size in the range of 150 – 200 μm, band gaps and LIDT of compounds have been discovered in the A-X<sup>II</sup><sub>4</sub>-X<sup>III</sup><sub>5</sub>-Q<sub>12</sub> system.

**Table S3.** Atomic coordinates and equivalent isotropic displacement parameters of CsCd<sub>4</sub>In<sub>5</sub>S<sub>12</sub>.

**Table S4.** Selected bond lengths (Å) of CsCd<sub>4</sub>In<sub>5</sub>S<sub>12</sub>.

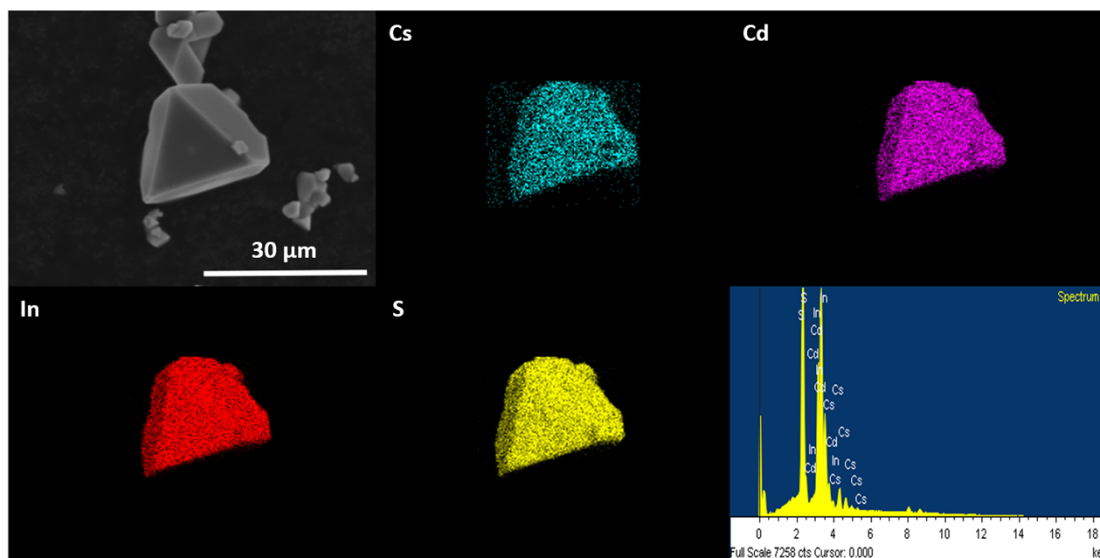

**Figure S1.** The SEM image and EDS result of CsCd<sub>4</sub>In<sub>5</sub>S<sub>12</sub> crystal, and element mapping of Cs, Cd, In and S in CsCd<sub>4</sub>In<sub>5</sub>S<sub>12</sub>.

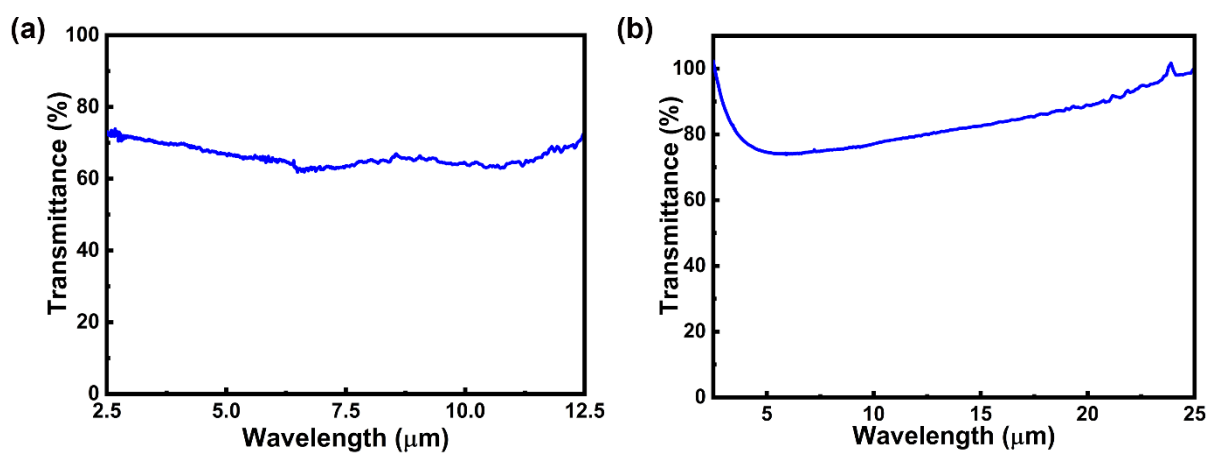

**Figure S2.** IR spectrum of CsCd<sub>4</sub>In<sub>5</sub>S<sub>12</sub> measured with a single crystal (a) and powder sample (b)

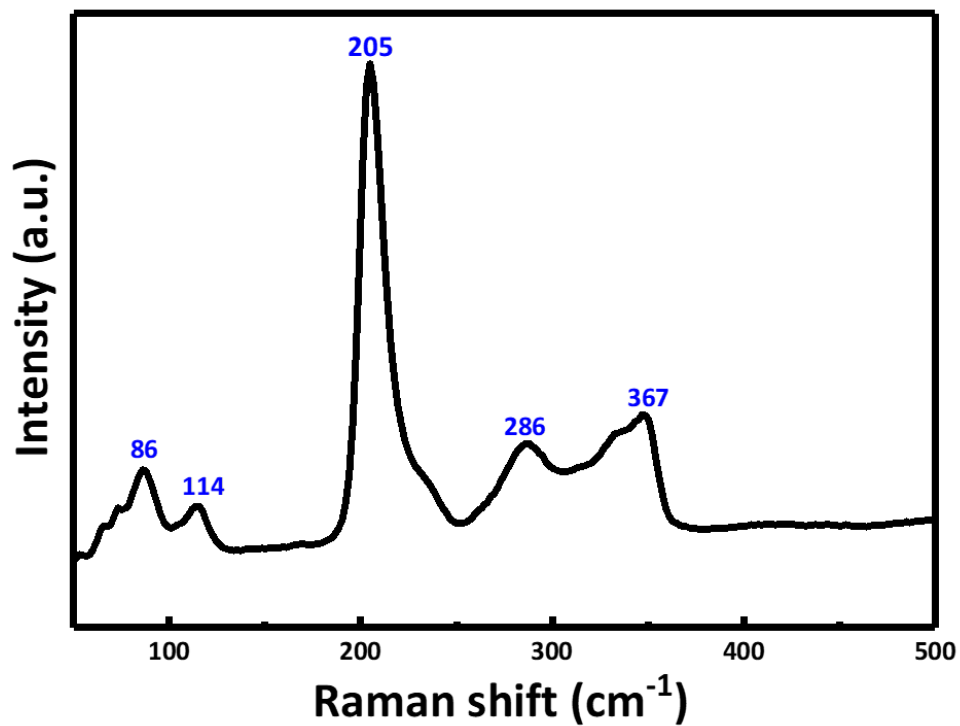

Figure S3. Raman spectrum of  $\text{CsCd}_4\text{In}_5\text{S}_{12}$ .

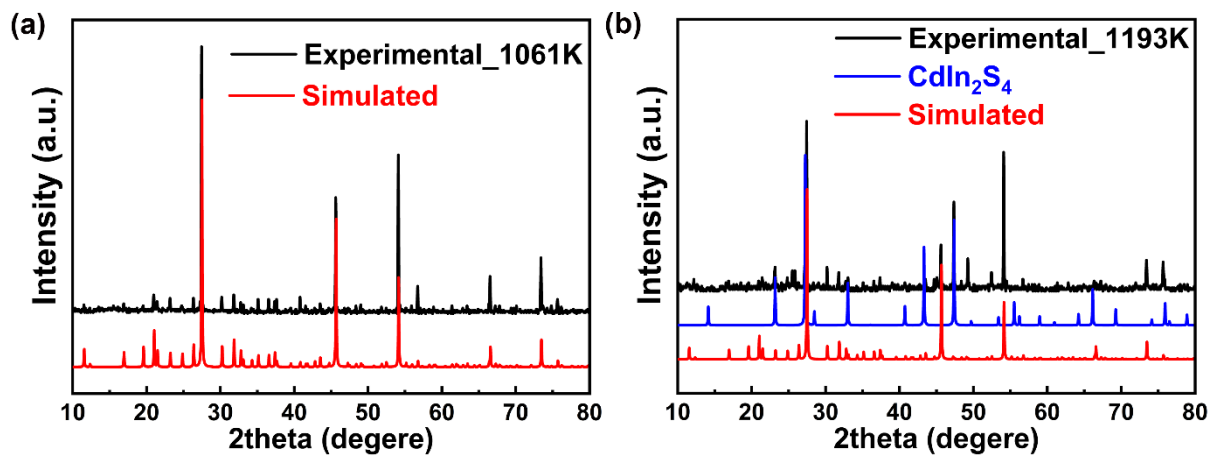

Figure S4. PXRD of  $\text{CsCd}_4\text{In}_5\text{S}_{12}$  after being heated at 1061 K (a) and 1193 K (b)

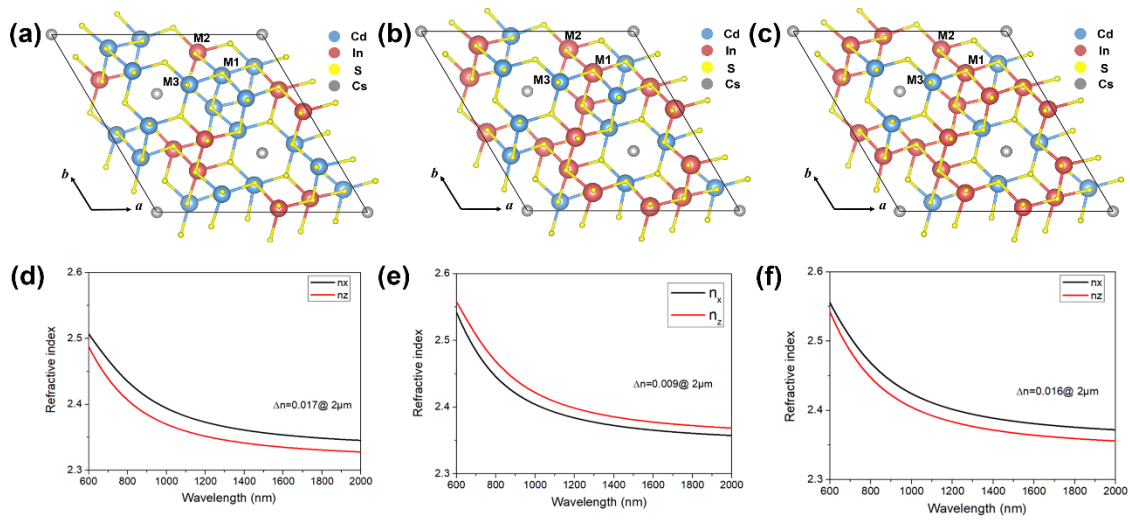

**Figure S5.** Structure models of  $\text{CsCd}_4\text{In}_5\text{S}_{12}$  used for calculation. A structure model with the disordered sites (the site M1 marked in Figure R4a) occupied by Cd (a) or by Cd and In in a ratio of 1:2 (b) or all by In atoms (c). Calculated refractive dispersion curve of  $\text{CsCd}_4\text{In}_5\text{S}_{12}$  model a (d), model b (e) and model c (f).

In these models, the M3 site is all occupied with Cd atoms while the M2 site is full filled with In atoms. According to the different situation of the occupation of M1 site, three models were calculated. In Figure S5, the M1 site in three models was all occupied by Cd ( $\text{M1} = (\text{Cd}_3)_{1/3}$ ) or In ( $\text{M1} = (\text{In}_3)_{1/3}$ ) atoms or filled with Cd and In in a ratio of 1:2 ( $\text{M1} = (\text{CdIn}_2)_{1/3}$ ,  $P1$  symmetry model).

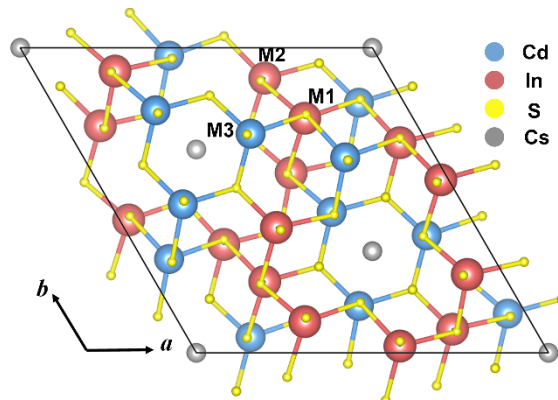

**Figure S6.** A structure model of  $\text{CsCd}_4\text{In}_5\text{S}_{12}$  used for calculation.

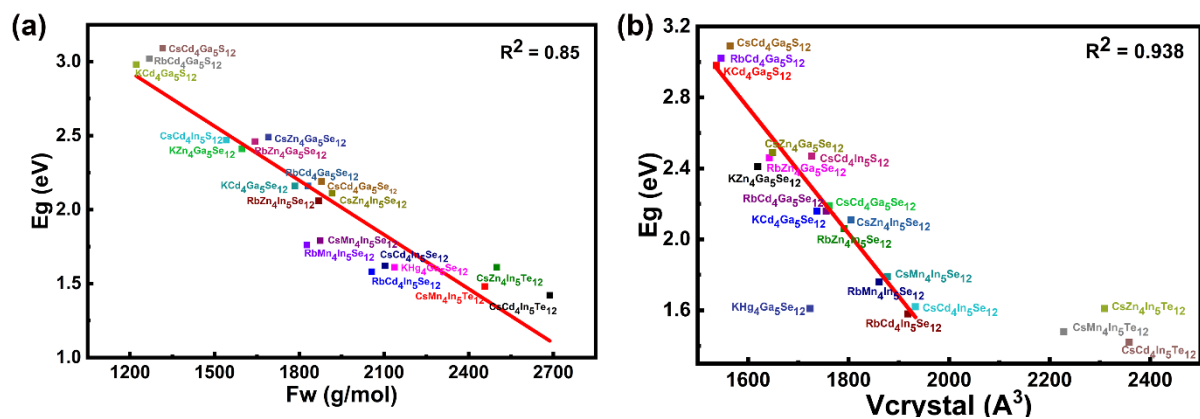

**Figure S7.**  $E_g$  vs the relative molecular mass (a) and  $E_g$  vs the volume (b) of compounds in the  $A-X^{II}_4-X^{III}_5-Q_{12}$  system

**Table S1.** EDS results of  $CsCd_4In_5S_{12}$ .

| Element | Weight% | Atomic% |
|---------|---------|---------|
| S K     | 22.78   | 51.59   |
| Cd L    | 28.69   | 18.53   |
| In L    | 39.13   | 24.74   |
| Cs L    | 9.40    | 5.14    |
| Totals  | 100.00  | 100.00  |

**Table S2.** The unit cell volume, SHG response at the particle size in the range of 150 – 200  $\mu\text{m}$ , band gaps and LIDT of compounds have been discovered in the  $\text{A-X}^{\text{II}}_4\text{-X}^{\text{III}}_5\text{-Q}_{12}$  system.

| Compounds                                  | $V_{\text{crystal}} (\text{\AA}^3)$ | SHG ( $\times$ AGS) | $E_g$ (eV) | LIDT ( $\times$ AGS) |
|--------------------------------------------|-------------------------------------|---------------------|------------|----------------------|
| $^1\text{KCd}_4\text{Ga}_5\text{S}_{12}$   | 1536.7                              | 2.1                 | 2.98       | /                    |
| $^1\text{RbCd}_4\text{Ga}_5\text{S}_{12}$  | 1546.5                              | 1.8                 | 3.02       | /                    |
| $^1\text{CsCd}_4\text{Ga}_5\text{S}_{12}$  | 1564.3                              | 1.6                 | 3.09       | /                    |
| $^2\text{KZn}_4\text{Ga}_5\text{Se}_{12}$  | 1619.48                             | 3.7                 | 2.41       | 23.4                 |
| $^2\text{RbZn}_4\text{Ga}_5\text{Se}_{12}$ | 1642.3                              | 3.1                 | 2.46       | 20.5                 |
| $^2\text{CsZn}_4\text{Ga}_5\text{Se}_{12}$ | 1649                                | 2.8                 | 2.49       | 19.2                 |
| $^3\text{KHg}_4\text{Ga}_5\text{Se}_{12}$  | 1723.7                              | 20                  | 1.61       | /                    |
| $^*\text{CsCd}_4\text{In}_5\text{S}_{12}$  | 1726.7                              | 1.08                | 2.47       | 9.29                 |
| $^4\text{KCd}_4\text{Ga}_5\text{Se}_{12}$  | 1737.1                              | 4.5                 | 2.16       | /                    |
| $^4\text{RbCd}_4\text{Ga}_5\text{Se}_{12}$ | 1755.6                              | 2.5                 | 2.16       | /                    |
| $^4\text{CsCd}_4\text{Ga}_5\text{Se}_{12}$ | 1761.3                              | 2                   | 2.19       | /                    |
| $^5\text{RbZn}_4\text{In}_5\text{Se}_{12}$ | 1791.4                              | 3.9                 | 2.06       | 13                   |
| $^5\text{CsZn}_4\text{In}_5\text{Se}_{12}$ | 1804.7                              | 3.5                 | 2.11       | 13                   |
| $^4\text{RbMn}_4\text{In}_5\text{Se}_{12}$ | 1861.1                              | 5.2                 | 1.76       | /                    |
| $^4\text{CsMn}_4\text{In}_5\text{Se}_{12}$ | 1877.2                              | 4.8                 | 1.79       | /                    |
| $^4\text{RbCd}_4\text{In}_5\text{Se}_{12}$ | 1918.1                              | 7.2                 | 1.58       | /                    |
| $^4\text{CsCd}_4\text{In}_5\text{Se}_{12}$ | 1932.9                              | 6                   | 1.62       | /                    |
| $^6\text{CsMn}_4\text{In}_5\text{Te}_{12}$ | 2228                                | 0.24                | 1.48       | /                    |
| $^6\text{CsZn}_4\text{In}_5\text{Te}_{12}$ | 2309.2                              | 0.83                | 1.61       | /                    |
| $^6\text{CsCd}_4\text{In}_5\text{Te}_{12}$ | 2358.4                              | 1.43                | 1.42       | /                    |

1.H. Lin, L.-J. Zhou and L. Chen, *Chemistry of Materials*, 2012, **24**, 3406-3414.

2.M. M. Chen, S. H. Zhou, W. Wei, X. T. Wu, H. Lin and Q. L. Zhu, *Inorg Chem*, 2021, **60**, 10038-10046.

3.M. Zhou, Y. Yang, Y. Guo, Z. Lin, J. Yao, Y. Wu and C. Chen, *Chemistry of Materials*, 2017, **29**, 7993-8002.

4.H. Lin, L. Chen, L. J. Zhou and L. M. Wu, *J Am Chem Soc*, 2013, **135**, 12914-12921.

5.H. Lin, Y. J. Zheng, X. N. Hu, H. Chen, J. S. Yu and L. M. Wu, *Chem Asian J*, 2017, **12**, 453-458

6. H. Lin, Y. Liu, L. J. Zhou, H. J. Zhao and L. Chen, *Inorg Chem*, 2016, **55**, 4470-4475.

**Table S3.** Atomic coordinates and equivalent isotropic displacement parameters of CsCd<sub>4</sub>In<sub>5</sub>S<sub>12</sub>.

| Atom    | Wyck.      | <i>x/a</i> | <i>y/b</i>  | <i>z/c</i> | U <sub>eq</sub> [Å <sup>2</sup> ] | Occu.       |
|---------|------------|------------|-------------|------------|-----------------------------------|-------------|
| Cs      | 3 <i>a</i> | -1/3       | -2/3        | 0.30157(6) | 0.0327(3)                         | 1           |
| Cd1/In1 | 9 <i>b</i> | 0.40971(8) | -0.02587(7) | 0.05075(4) | 0.0161(3)                         | 0.367/0.633 |
| Cd2/In2 | 9 <i>b</i> | 0.43289(9) | 0.41079(10) | 0.71363(2) | 0.0174(4)                         | 0.462/0.538 |
| Cd3/In3 | 9 <i>b</i> | 0.53833(4) | 0.15344(4)  | 0.38778(3) | 0.0171(6)                         | 0.505/0.495 |
| S1      | 9 <i>b</i> | 0.41281(9) | -0.03548(1) | 0.30635(1) | 0.0158(8)                         | 1           |
| S2      | 9 <i>b</i> | 0.54744(1) | 0.16472(9)  | 0.64340(1) | 0.0159(8)                         | 1           |
| S3      | 9 <i>b</i> | 0.29560(1) | 0.22602(1)  | 0.63586(1) | 0.0164(6)                         | 1           |
| S4      | 9 <i>b</i> | 0.38396(1) | 0.54050(1)  | 0.61658(1) | 0.0167(8)                         | 1           |

**Table S4.** Selected bond lengths (Å) of CsCd<sub>4</sub>In<sub>5</sub>S<sub>12</sub>.

| CsCd <sub>4</sub> In <sub>5</sub> S <sub>12</sub> | Length (Å) |
|---------------------------------------------------|------------|
| Cd1/In1 – S1                                      | 2.481(7)   |
| Cd1/In1 – S1 <sup>II</sup>                        | 2.492(2)   |
| Cd1/In1 – S2                                      | 2.483(9)   |
| Cd1/In1 – S3                                      | 2.492(3)   |
| Cd2/In2 – S2                                      | 2.493(3)   |
| Cd2/In2 – S3                                      | 2.494(0)   |
| Cd2/In2 – S3 <sup>II</sup>                        | 2.496(6)   |
| Cd2/In2 – S4                                      | 2.476(3)   |
| Cd3/In3 – S1                                      | 2.512(1)   |
| Cd3/In3 – S2                                      | 2.491(4)   |
| Cd3/In3 – S4                                      | 2.493(8)   |
| Cd3/In3 – S4 <sup>II</sup>                        | 2.494(7)   |
| Cs1 – S1 × 3                                      | 3.824(4)   |
| Cs1 – S2 × 3                                      | 3.822(0)   |



**Cs1 – S3 × 3** 3.831(9)

**Cs1 – S4 × 3** 3.806(5)

---
